# Supplementary material
Source: publisher site journal article supplement (https://www.spandidos-publications.com/140/downloadSupplementary)

Figure S1. Preparative high-performance liquid chromatography profiles of harmine (Column, SunFire™ Pre C18 5  $\mu$ m 10x250 mm; mobile phase, CH<sub>3</sub>OH/H<sub>2</sub>O=50/50; flow rate, 10 ml/min; wavelength, 210 nm; temperature, room temperature).

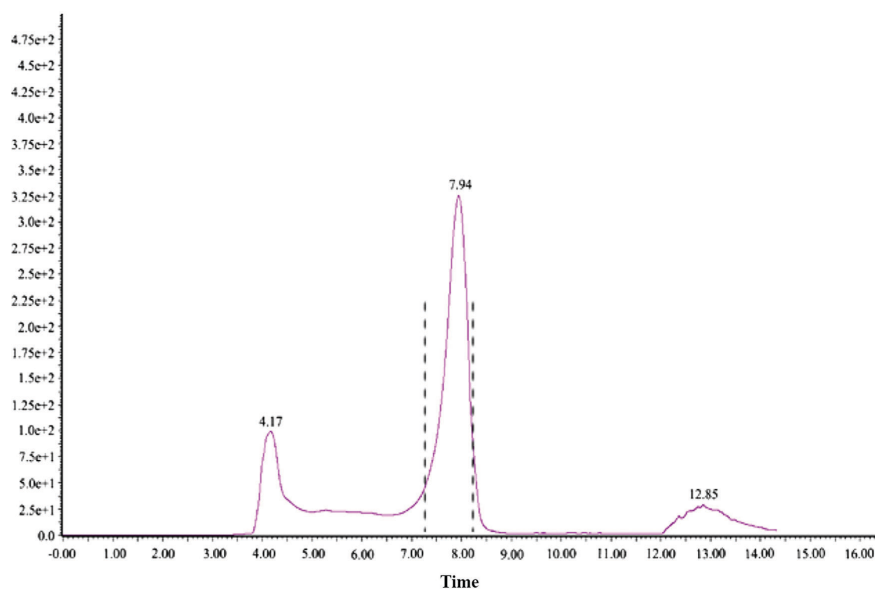

Figure S2. Positive-ESI-Mass spectrum of cyclocommunol.

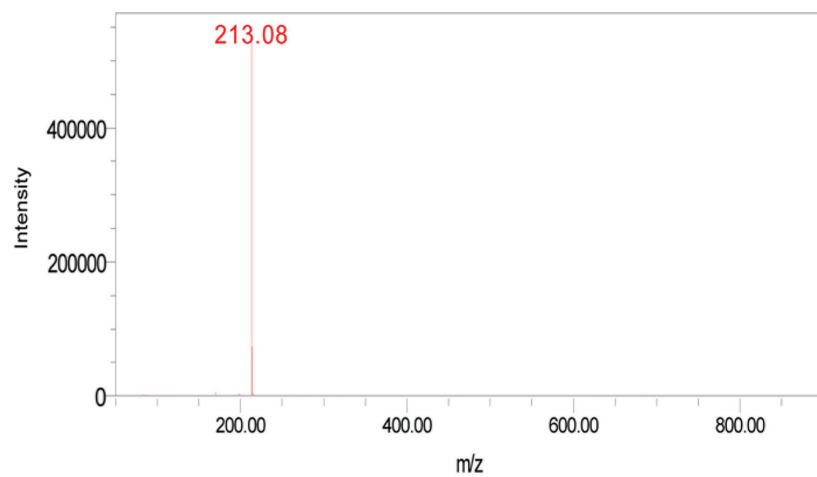

Figure S3.  $^1\text{H}$  NMR spectrum (400 MHz,  $\text{DMSO}-d_6$ ) of cyclocomunol.

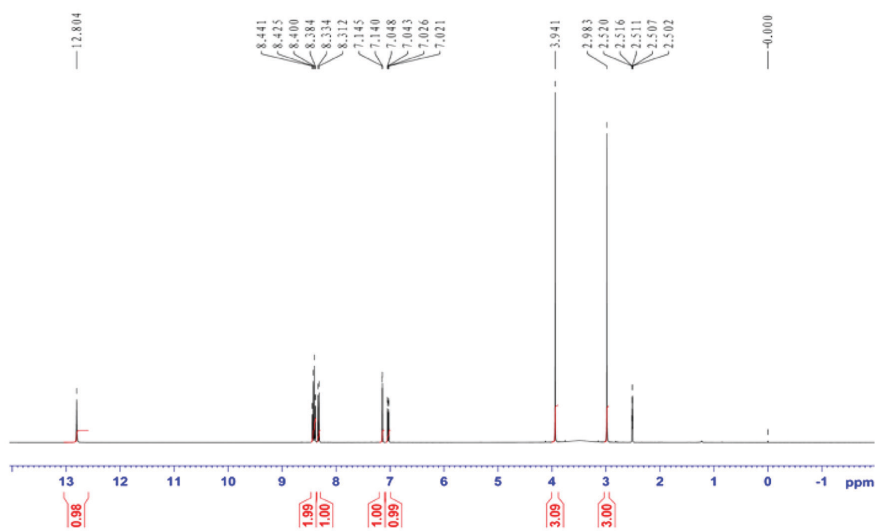

Figure S4.  $^{13}\text{C}$  NMR spectrum (100 MHz,  $\text{DMSO}-d_6$ ) of cyclocommunol.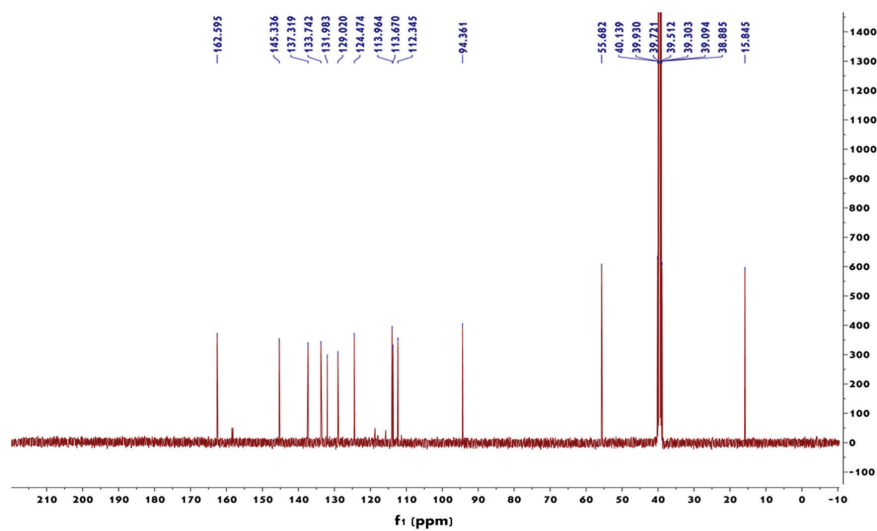

Figure S5. HSQC spectrum (100 MHz, DMSO- $d_6$ ) of cyclocommunol.

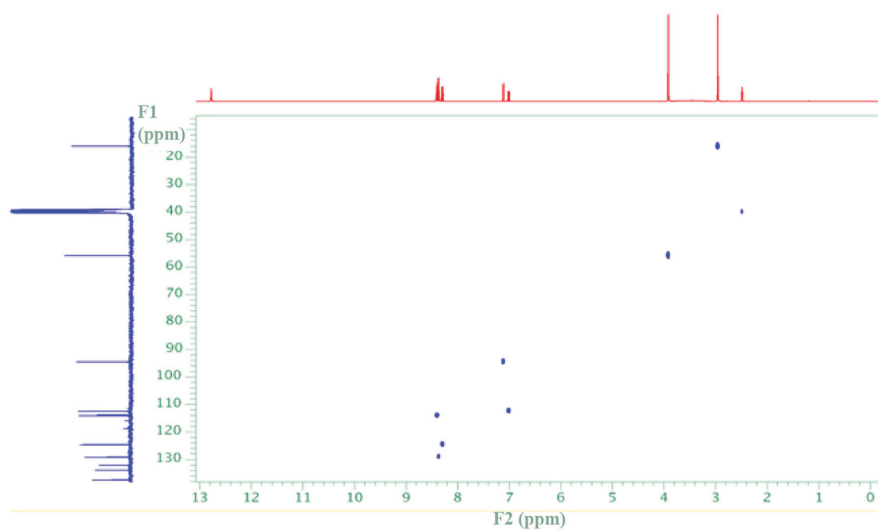

Figure S6. HMBC spectrum (100 MHz, DMSO- $d_6$ ) of cyclocommunol.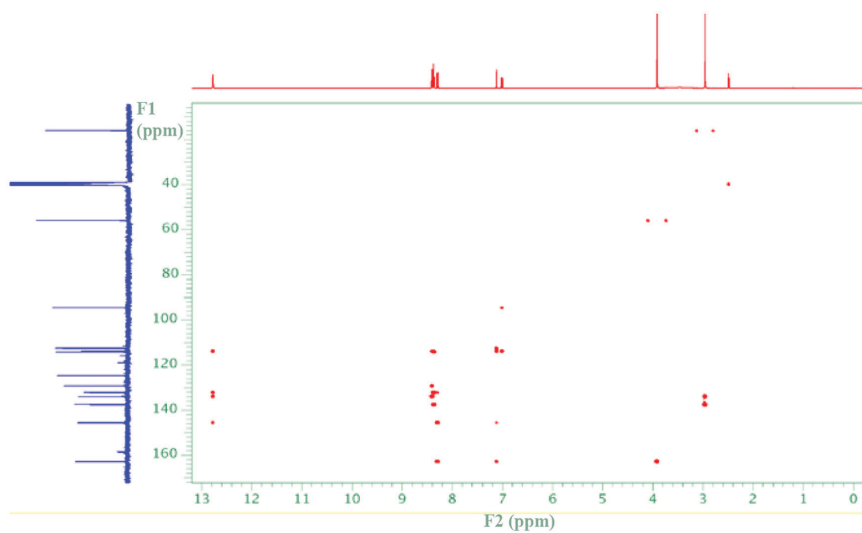

Figure S7. NOESY spectrum (100 MHz, DMSO- $d_6$ ) of cyclocommunol.

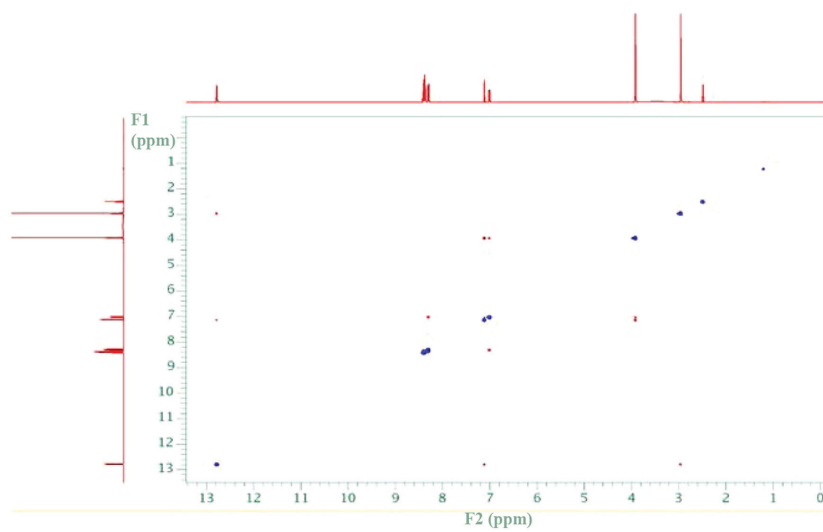

Figure S8. Purity of harmine (Column, Waters Xselect CSH 4.6x250 mm, 5  $\mu$ m; mobile phase, CH<sub>3</sub>OH and 0.2% phosphoric acid-H<sub>2</sub>O; flow rate, 1.1 ml/min; wavelength, 215 nm; temperature, 30°C).

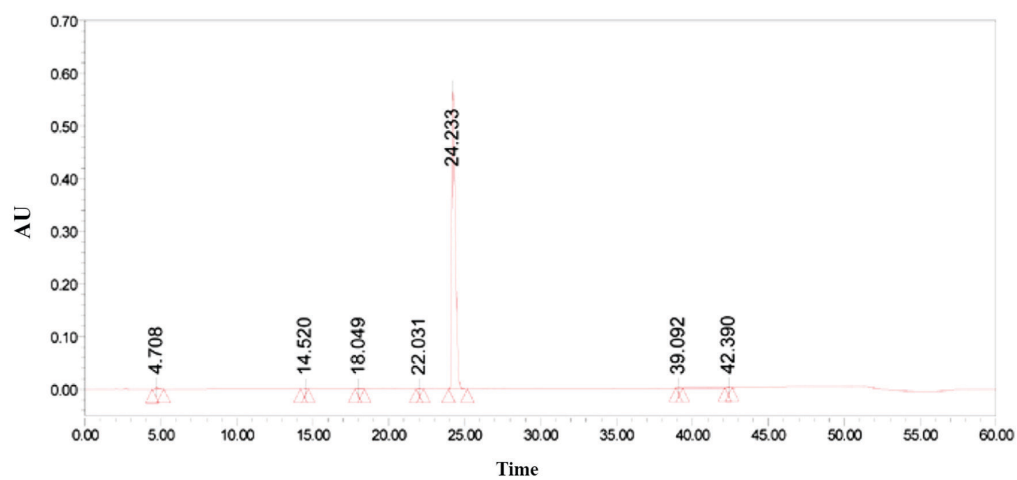

Supplement: Supplementary file 1 [file downloadSupplementary]
